# Supplementary material
Source: PubMed Central journal article supplement (PMC6870999)
Supplement: 41592_2013_BFnmeth2642_MOESM309_ESM.pdf [file 41592_2013_BFnmeth2642_MOESM309_ESM.pdf]

**A** Use case 1: Browsing IntOGen-mutations web discover resource

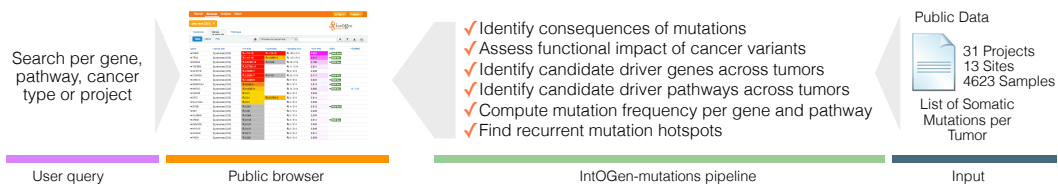

**B** Use case 2: Analysis of somatic mutations in a cohort of tumors

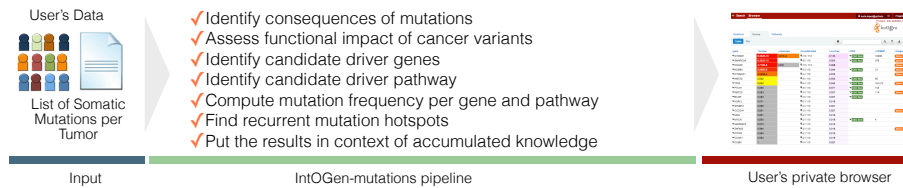

**C** Use case 3: Analysis of somatic mutations in a tumor of an individual patient

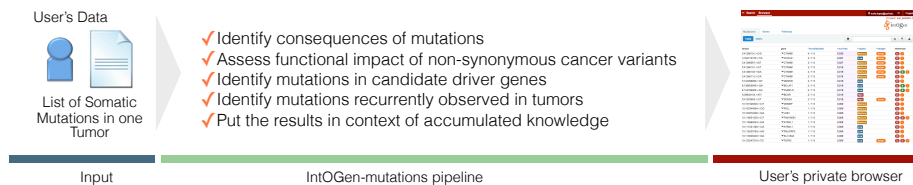

**Supplementary Figure 1.** Diagram representing three different use cases of the IntOGen-mutations resource. A) The IntOGen-mutations pipeline is used to compute the results of periodically obtained public data and populate the IntOGen web discovery tool. Users can browse the results of the pipeline through the IntOGen-mutations public browser searching per gene, pathway, cancer type or tumor sequencing project.

B) Users employ the IntOGen-mutations pipeline, either through the web server or locally to analyze their own data, thus obtaining a private browser with their results. In the use case 2, users input a list of somatic mutations from a cohort of tumor samples to identify putative driver genes. The results can be browsed within the context of accumulated knowledge in IntOGen.

C) The pipeline can also be used to rank somatic mutations identified in the tumor of an individual patient to assess their potential implication in cancer development.

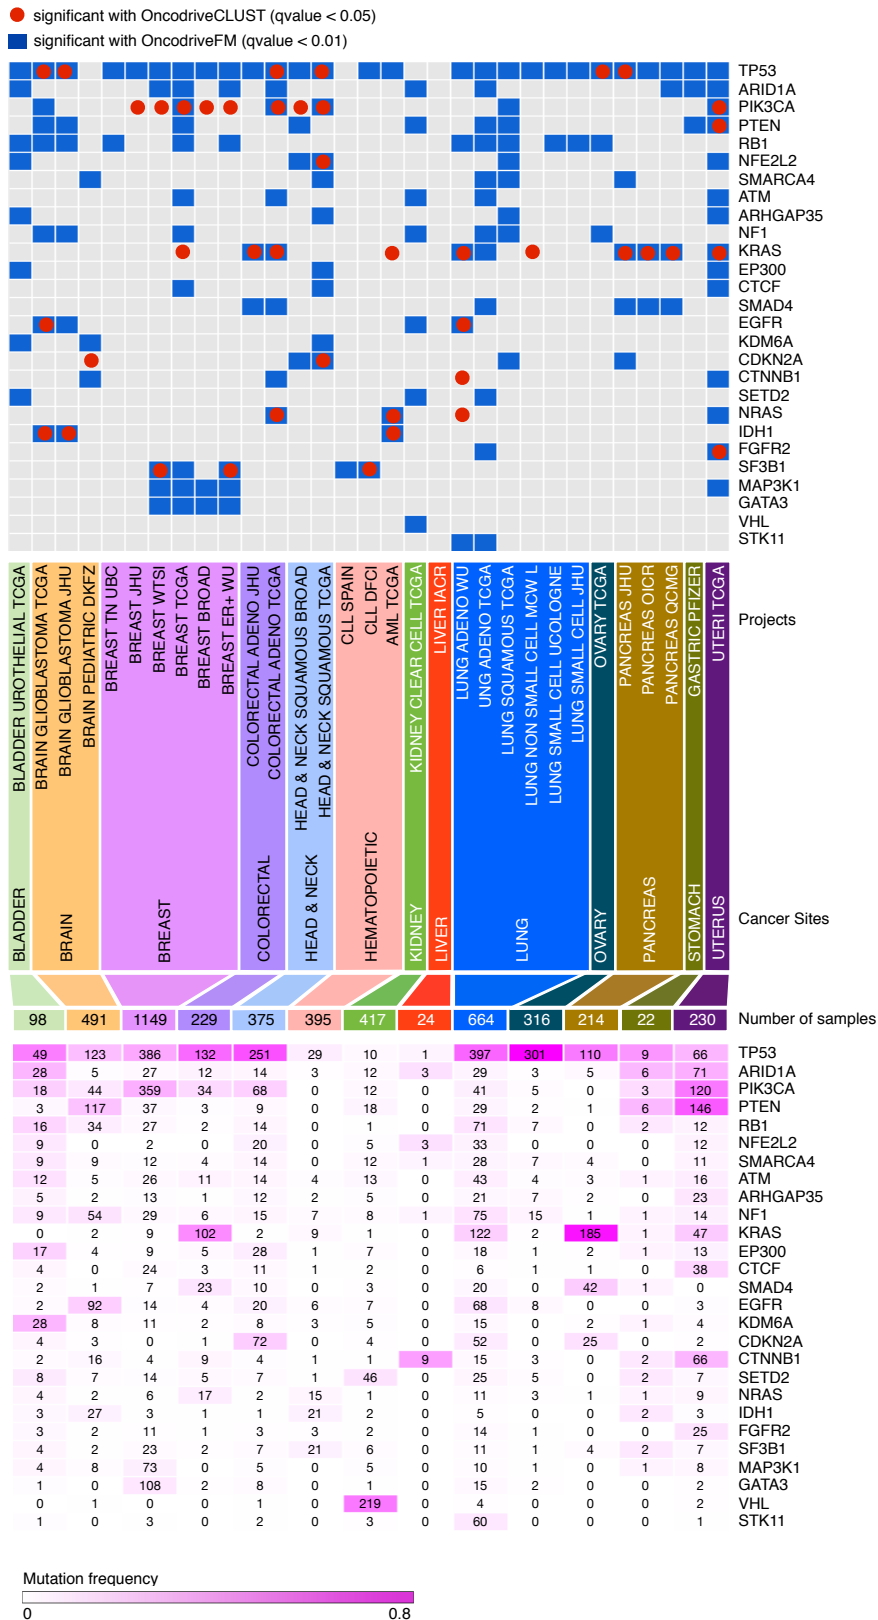

**Supplementary Figure 2.** Results in IntOGen for a list of selected genes. The upper panel indicates if the genes are detected as drivers by OncodriveFM (blue squares) or OncodriveCLUST (red circles) in each project. In the lower panel the projects are aggregated by cancer site. Numbers indicate the total of samples with mutations in each gene and cancer site; the frequency is shown in a color scale from white to purple.

## Supplementary Table 1

### Somatic mutations datasets included within the IntOGen-mutations web discovery tool

| Project name                    | Description                           | Site          | Institution                      | Obtained from | Pubmed                | Tumor samples |
|---------------------------------|---------------------------------------|---------------|----------------------------------|---------------|-----------------------|---------------|
| <b>BLADDER UROTHELIAL TCGA</b>  | Bladder urothelial carcinoma          | bladder       | TCGA                             | Synapse       | -                     | 98            |
| <b>BRAIN GLIOBLASTOMA TCGA</b>  | Glioblastoma multiforme               | brain         | TCGA                             | Synapse       | 18772890              | 290           |
| <b>BRAIN GLIOBLASTOMA JHU</b>   | Glioblastoma multiforme               |               | Johns Hopkins University         | ICGC DCC      | 18772396              | 88            |
| <b>BRAIN PEDIATRIC DKFZ</b>     | Pediatric brain tumors                |               | DKFZ                             | ICGC DCC      | 22265402/<br>22286061 | 113           |
| <b>BREAST JHU</b>               | Breast cancer                         | breast        | Johns Hopkins University         | ICGC DCC      | 17932254              | 42            |
| <b>BREAST WTSI</b>              | Breast cancer                         |               | Wellcome Trust/ Sanger Institute | ICGC DCC      | 22722201              | 100           |
| <b>BREAST TN UBC</b>            | Triple negative breast cancer         |               | University of British Columbia   | SM            | 22495314              | 65            |
| <b>BREAST TCGA</b>              | Breast invasive carcinoma             |               | TCGA                             | Synapse       | 23000897              | 762           |
| <b>BREAST BROAD</b>             | Breast cancer                         |               | BROAD Institute                  | SM            | 22722202              | 103           |
| <b>BREAST ER+ WU</b>            | ER+ breast cancer                     |               | Washington University            | SM            | 22722193              | 77            |
| <b>COLORECTAL ADENO JHU</b>     | Colorectal adenocarcinoma             | colorectal    | Johns Hopkins University         | ICGC DCC      | 17932254              | 36            |
| <b>COLORECTAL ADENO TCGA</b>    | Colorectal adenocarcinoma             |               | TCGA                             | Synapse       | 22810696              | 193           |
| <b>HEAD/NECK SQUAMOUS BROAD</b> | Head and neck squamous cell carcinoma | Head & neck   | Broad Institute                  | SM            | 21798893              | 74            |
| <b>HEAD/NECK SQUAMOUS TCGA</b>  | Head and neck squamous cell carcinoma |               | TCGA                             | Synapse       | -                     | 301           |
| <b>CLL SPAIN</b>                | Chronic lymphocytic leukemia          | hematopoietic | Spanish Ministry of Science      | ICGC DCC      | 21642962/<br>22158541 | 109           |
| <b>CLL DFCI</b>                 | Chronic lymphocytic leukemia          |               | Dana Farber Cancer Institute     | SM            | 22150006              | 90            |
| <b>AML TCGA</b>                 | Acute myeloid leukemia                |               | TCGA                             | Synapse       | -                     | 196           |
| <b>KIDNEY CLEAR CELL</b>        | Kidney clear cell carcinoma           | kidney        | TCGA                             | Synapse       | -                     | 417           |

|                                 |                                       |          |                                           |          |          |     |
|---------------------------------|---------------------------------------|----------|-------------------------------------------|----------|----------|-----|
| <b>TCGA</b>                     |                                       |          |                                           |          |          |     |
| <b>LIVER IARC</b>               | Liver cancer                          | liver    | IACR                                      | ICGC DCC | 22561517 | 24  |
| <b>LUNG ADENO WU</b>            | Lung adenocarcinoma                   | lung     | Washington University School of Medicine  | ICGC DCC | 18948947 | 162 |
| <b>LUNG NON SMALL CELL MCW</b>  | Non small cell lung cancer            |          | Medical College of Wisconsin              | SM       | 22510280 | 31  |
| <b>LUNG SQUAMOUS TCGA</b>       | Lung squamous cell carcinoma          |          | TCGA                                      | Synapse  | 22960745 | 174 |
| <b>LUNG ADENO TCGA</b>          | Lung adenocarcinoma                   |          | TCGA                                      | Synapse  | -        | 228 |
| <b>LUNG SMALL CELL UCOLOGNE</b> | Small cell lung cancer                |          | University Cologne                        | SM       | 22941188 | 27  |
| <b>LUNG SMALL CELL JHU</b>      | Small cell lung cancer                |          | Johns Hopkins University                  | SM       | 22941189 | 42  |
| <b>OVARY TCGA</b>               | Ovarian serous cystadenocarcinoma     | ovary    | TCGA                                      | Synapse  | 21720365 | 316 |
| <b>PANCREAS JHU</b>             | Pancreatic cancer                     | pancreas | Johns Hopkins University                  | ICGC DCC | 18772397 | 114 |
| <b>PANCREAS OICR</b>            | Pancreatic cancer                     |          | Ontario Institute for Cancer Research     | ICGC DCC | -        | 33  |
| <b>PANCREAS QCMG</b>            | Pancreatic cancer                     |          | Queensland Centre for Medical Genomics    | ICGC DCC | -        | 67  |
| <b>GASTRIC PFIZER</b>           | Gastric cancer                        | stomach  | Pfizer Worldwide Research and Development | SM       | 22037554 | 22  |
| <b>UTERI TCGA</b>               | Uterine corpus endometrioid carcinoma | uterus   | TCGA                                      | Synapse  | -        | 230 |

## Supplementary Table 2

Number of likely driver genes identified by OncodriveFM and OncodriveCLUST in each tumors genome re-sequencing project analyzed.

### Legend

**CLUST biased genes:** genes with significant mutations clustering

**FM biased genes:** genes with significant FM bias

**Total:** number of genes with one positive selection mark

**Known:** number of genes already known to be involved in cancer (annotated in the Cancer Gene Census)

**r:** ratio of known cancer genes-to-total genes within all genes exhibiting one positive selection mark

| Project name             | Cancer site   | Samples | FM biased genes |           | CLUST biased genes |           |
|--------------------------|---------------|---------|-----------------|-----------|--------------------|-----------|
|                          |               |         | Total           | Known (r) | Total              | Known (r) |
| BLADDER UROTHELIAL TCGA  | bladder       | 98      | 24              | 9 (0.375) | 2                  | 0 (0)     |
| BRAIN GLIOBLASTOMA TCGA  | brain         | 290     | 26              | 11 (0.42) | 12                 | 4 (0.33)  |
| BRAIN GLIOBLASTOMA JHU   |               | 88      | 6               | 6 (1)     | 3                  | 2 (0.67)  |
| BRAIN PEDIATRIC DKFZ     |               | 113     | 5               | 3 (0.6)   | 2                  | 1 (0.5)   |
| BREAST JHU               | breast        | 42      | 2               | 1 (0.5)   | 0                  | 0         |
| BREAST WTSI              |               | 100     | 8               | 6 (0.75)  | 3                  | 3 (1)     |
| BREAST TN UBC            |               | 65      | 1               | 1 (1)     | 2                  | 1 (0.5)   |
| BREAST TCGA              |               | 762     | 39              | 18 (0.46) | 5                  | 3 (0.6)   |
| BREAST BROAD             |               | 103     | 7               | 5 (0.71)  | 7                  | 3 (0.43)  |
| BREAST ER+ WU            |               | 77      | 10              | 7 (0.7)   | 2                  | 2 (1)     |
| COLORECTAL ADENO JHU     | colorectal    | 36      | 4               | 4 (1)     | 2                  | 2 (1)     |
| COLORECTAL ADENO TCGA    |               | 193     | 25              | 12 (0.48) | 7                  | 6 (0.86)  |
| HEAD/NECK SQUAMOUS BROAD | Head and neck | 74      | 7               | 3 (0.43)  | 2                  | 2 (1)     |
| HEAD/NECK SQUAMOUS TCGA  |               | 301     | 58              | 16 (0.28) | 45                 | 7 (0.15)  |
| CLL SPAIN                | hematopoietic | 109     | 1               | 1 (1)     | 1                  | 1 (1)     |
| CLL DFCI                 |               | 90      | 3               | 3 (1)     | 2                  | 2 (1)     |
| AML TCGA                 |               | 196     | 15              | 15 (1)    | 9                  | 9 (1)     |
| KIDNEY CLEAR CELL TCGA   | kidney        | 417     | 21              | 11 (0.52) | 4                  | 0 (0)     |
| LIVER IARC               | liver         | 24      | 0               | 0         | 1                  | 1 (1)     |
| LUNG ADENO WU            | lung          | 162     | 4               | 4 (1)     | 4                  | 3 (0.75)  |
| LUNG NON SMALL CELL MCW  |               | 31      | 3               | 1 (0.33)  | 0                  | 0         |
| LUNG SQUAMOUS TCGA       |               | 174     | 50              | 9 (0.18)  | 0                  | 0         |
| LUNG ADENO TCGA          |               | 228     | 77              | 10 (0.13) | 1                  | 1 (1)     |
| LUNG SMALL CELL UCOLOGNE |               | 27      | 2               | 2 (1)     | 0                  | 0         |
| LUNG SMALL CELL JHU      |               | 42      | 6               | 2 (0.33)  | 0                  | 0         |
| OVARY TCGA               | ovary         | 316     | 10              | 6 (0.6)   | 1                  | 1 (1)     |
| PANCREAS JHU             | pancreas      | 114     | 7               | 6 (0.86)  | 3                  | 2 (0.67)  |
| PANCREAS OICR            |               | 33      | 4               | 3 (0.75)  | 1                  | 1 (1)     |
| PANCREAS QCMG            |               | 67      | 7               | 4 (0.57)  | 2                  | 1 (0.5)   |
| GASTRIC PFIZER           | stomach       | 22      | 19              | 4 (0.21)  | 0                  | 0         |
| UTERI TCGA               | uterus        | 230     | 75              | 19 (0.25) | 5                  | 5 (1)     |

### Supplementary Table 3

#### Number of likely driver genes identified by OncodriveFM and OncodriveCLUST in each cancer site analyzed.

**Legend**

**CLUST biased genes:** genes with significant mutations clustering

**FM biased genes:** genes with significant FM bias

**Total:** number of genes with one positive selection mark

**Known:** number of genes already known to be involved in cancer (annotated in the Cancer Gene Census)

**r:** ratio of known cancer genes-to-total genes within all genes exhibiting one positive selection mark

| Site          | Number of projects | Samples | FM biased genes |           | CLUST biased genes |           |
|---------------|--------------------|---------|-----------------|-----------|--------------------|-----------|
|               |                    |         | Total           | Known (r) | Total              | Known (r) |
| Bladder       | 1                  | 98      | 24              | 9 (0.375) | 2                  | 0 (0)     |
| Brain         | 3                  | 491     | 31              | 14 (0.45) | 15                 | 5 (0.33)  |
| Breast        | 6                  | 1148    | 36              | 16 (0.44) | 13                 | 6 (0.46)  |
| Colorectal    | 2                  | 229     | 23              | 13 (0.56) | 7                  | 6 (0.86)  |
| Head and neck | 2                  | 375     | 58              | 16 (0.28) | 45                 | 7 (0.16)  |
| Hematopoietic | 3                  | 395     | 18              | 17 (0.94) | 12                 | 12 (1)    |
| Kidney        | 1                  | 417     | 21              | 11 (0.52) | 4                  | 0 (0)     |
| Liver         | 1                  | 24      | 0               | 0         | 1                  | 1 (1)     |
| Lung          | 6                  | 664     | 126             | 19 (0.15) | 3                  | 3 (1)     |
| Ovary         | 1                  | 316     | 10              | 6 (0.6)   | 1                  | 1(1)      |
| Pancreas      | 3                  | 214     | 9               | 6 (0.67)  | 4                  | 2 (0.5)   |
| Stomach       | 1                  | 22      | 19              | 4 (0.21)  | 1                  | 0         |
| Uterus        | 1                  | 230     | 75              | 19 (0.25) | 5                  | 5 (1)     |
| GLOBAL        | 31                 | 4623    | 347             | 76 (0.22) | 89                 | 29 (0.33) |

## Supplementary Note 1

### Comparison of candidate driver genes detected by IntOGen-mutations pipeline and those reported in the original publication

In order to further validate the results obtained with IntOGen-mutations pipeline we compared the results (lists of driver genes) reported in original publications with those obtained with the pipeline for some of the projects. We choose four projects that have used well-known methods to identify significantly mutated genes and for which we have used exactly the same list of somatic mutations as input for the pipeline. Note that for some TCGA projects included in IntOGen we have used the most up-to-date list of mutations, which may not correspond to the one reported in the publication, as more tumors sequences may have been made available after publication, for this reason those were not used for comparison. As a result of the comparison, we found that the methods to identify driver genes included in IntOGen-mutations (OncodriveFM and OncodriveCLUST) are able to identify most of the *bona fide* cancer drivers identified in the original manuscripts and often also identify as drivers some known cancer genes not reported in the original manuscript. Next, we discuss these comparisons in detail.

#### Comparison with Barneji et al (BREAST BROAD)

Banerji et al<sup>1</sup> report the identification of 10 significantly mutated genes using MutSig FDR < 0.1. They discarded 4 of them after manual review of reads and subsequent orthogonal confirmation of somatic events (see Supplementary Table 6A from Banerji et al). The IntOGen-mutations pipeline identifies the 6 significantly mutated genes detected by MutSig which are kept after the manual review and orthogonal confirmation (namely TP53, CBFB, GATA3, MAP3K1, PIK3CA and AKT1), while it does not detect as significant any of the discarded genes (namely PCGF2, ZBED4, WEE1, BZRAP1). In addition, OncodriveFM detects 3 other genes (NOTCH2, MLL and AKR1C3) and OncodriveCLUST identifies 3 more (ERBB2, RSN1L and PRKCZ) (Figure S1). Note that both OncodriveFM and OncodriveCLUST identify AKR1C3. Three of the genes detected by the IntOGen-mutations pipeline and not MutSig are well-known cancer genes (NOTCH2, MLL and ERBB2), which reinforce the validity of the results. The other genes are novel candidates -and always we have to consider that some may be false positives- until their oncogenic role has been established.

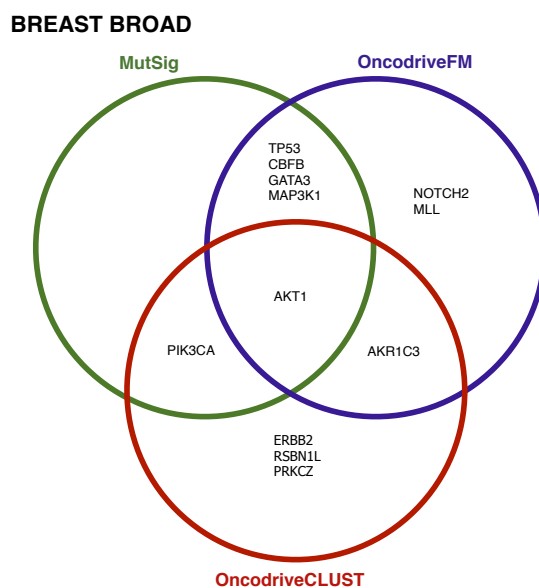

**Figure S1.** Venn diagram showing the overlap between genes detected by MutSig in Barneji et al and those identified by OncodriveFM and OncodriveCLUST using IntOGen-mutations pipeline.

## Comparison with Stransky et al (HNSCC BROAD)

Stransky et al<sup>2</sup> describe the identification of 38 significantly mutated genes (false discovery rate  $q < 0.1$ ) according to MutSig (see Supplementary Table 7 in Stransky et al). Nine of those are also detected by OncodriveFM and/or OncodriveCLUST ( $q\text{value} < 0.05$ , see Figure S2). Among the other 29 some may be *bona fide* driver genes (eg. PRDM2), however some clear false positives are also recognized (eg. OR5L2, OR4C15). On the other hand OncodriveFM also detects 8 other genes, among which are MACF1, NFE2L2, NCOR1, NSD1 and PIK3CG. MACF1 (microtubule actin cross-linking factor 1) appears to be involved in the Wnt signaling pathway and functions as a positive regulator in the translocation of Axin and its associated complex from the cytoplasm to the cell membrane, an indispensable step to transduce signaling upon Wnt stimulation<sup>3</sup>. NFE2L2 (also named NRF2) is a transcription factor known to be involved in lung cancer<sup>4,5</sup>. NCOR1 is a protein that mediates repression of thyroid-hormone and retinoic-acid receptors by promoting chromatin condensation and preventing access of the transcription machinery<sup>6</sup>, and also takes part in ligand-dependent transcriptional repression by oestrogen receptor alpha. Mutations in this gene are also reported in breast cancer samples in Stephens et al<sup>7</sup>. NSD1 is a nuclear receptor binding with a SET domain: it is frequently translocated with NUP98 in acute myeloid leukemia (AML)<sup>8</sup> and mutations in this gene have been identified as the major cause of a childhood overgrowth syndrome (Sotos syndrome)<sup>9</sup>. Again, among the genes detected by OncodriveFM and OncodriveCLUST we always have to consider that some may be false positives, until their oncogenic role has been clearly established.

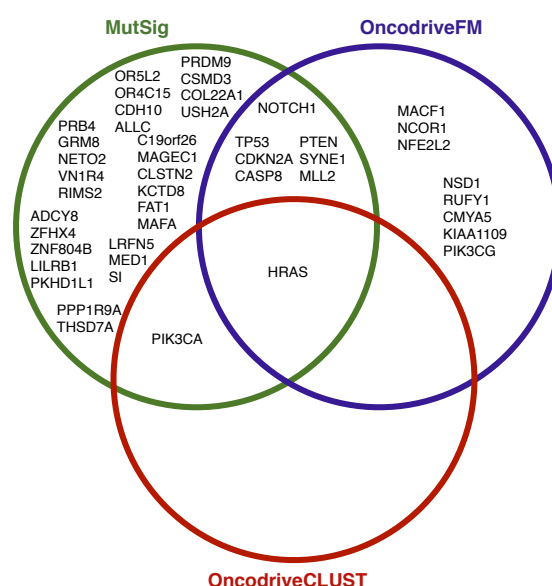

**Figure S2.** Venn diagram showing the overlap between genes detected by MutSig in Stransky et al and those identified by OncodriveFM and OncodriveCLUST in the IntOGen-mutations pipeline.

## Comparison with Ellis et al (BREAST ER WU)

Ellis et al<sup>10</sup> identify 18 significantly mutated genes with a convolution false discovery rate (FDR)  $< 0.26$  (Table 1 and Supplementary Table 6 in Ellis et al). Twelve of those are also detected by OncodriveFM and/or OncodriveCLUST ( $q\text{value} < 0.05$ , see Figure S3). OncodriveFM detects 8 other genes among which there are some well known cancer genes (eg. MLL2, CHD4, ARID1A) and some good candidates, for example RREB1, a transcription factor that binds specifically to the RAS-responsive elements (RRE) of gene promoters.



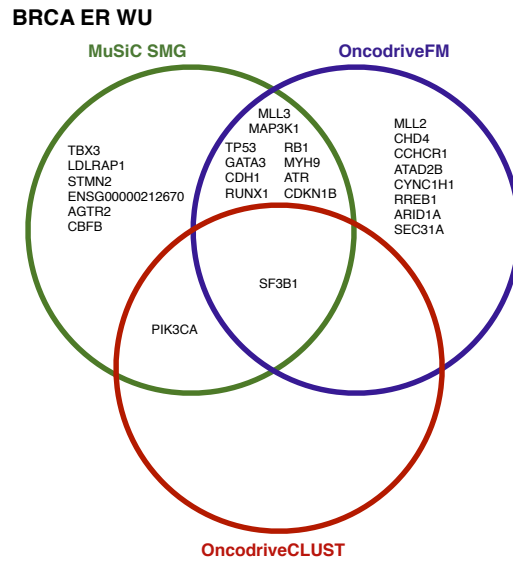

**Figure S3.** Venn diagram showing the overlap between genes detected by MuSiC (convolution test) and those identified by OncodriveFM and OncodriveCLUST in the IntOGen-mutations pipeline.

#### Comparison with TCGA LAML paper (AML TCGA)

The manuscript describing the TCGA work on de novo acute myeloid leukemia<sup>11</sup> identifies 23 significantly mutated genes using MuSiC<sup>12</sup> (false discovery rate < 0.05, Table S7 of TCGA manuscript). Most of those are detected by OncodriveFM and/or OncodriveCLUST (Figure S4). OncodriveFM also identifies ASXL1, GATA2 and NF1. ASXL1 is a protein associated to polycomb repressive complex 2 (PRC2)<sup>13</sup> that is recurrently mutated in patients with myelodysplastic syndrome, myeloproliferative neoplasms, and acute myeloid leukemia. GATA2 is a transcription factor involved in myeloid malignancies. Heritable mutations in GATA2 are associated with familial myelodysplastic syndrome and acute myeloid leukemia<sup>14-18</sup>.

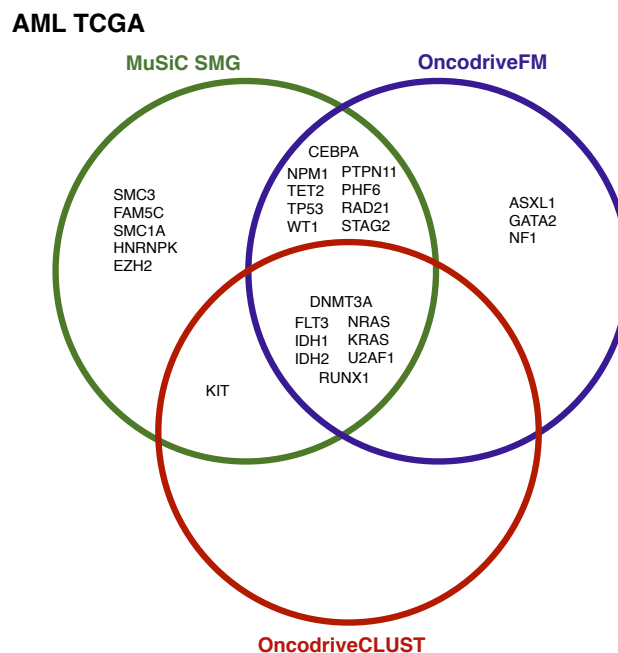

**Figure S4.** Venn diagram showing the overlap between genes detected by MuSiC and those identified by OncodriveFM and OncodriveCLUST in the IntOGen-mutations pipeline.

## Comparison of the lists of candidate driver genes detected by OncodriveFM with known cancer genes

The absence of curated gold-standard datasets of driver and passenger genes limits efforts to validate the results of bioinformatics method to identify novel driver candidates. We have therefore taken an indirect approach to validate the results of our methods included in IntOGen. Briefly, we computed the rate of known cancer genes (from the Cancer Gene Census, or CGC<sup>19</sup>) amongst increasing lists of top candidate genes identified by OncodriveFM (Figure S5). (Because OncodriveCLUST detects only few genes in all sites, the same analysis would not add to the information already shown in Supplementary Table 3.) While high-ranking genes (25 top in blue) identified in all cancer sites are highly enriched for known cancer genes, as lower-ranking genes are incorporated to the analysis this rate steadily decreases. This indicates that top-ranking genes in the lists of candidates are all probably *bona fide* drivers. Since the lists of driver candidates reported in each site (see Supp. Table 3 for the actual size and known cancer genes rate of each list) fall include mostly or exclusively very high-ranking genes, these are enriched for likely cancer genes rather than spurious predictions.

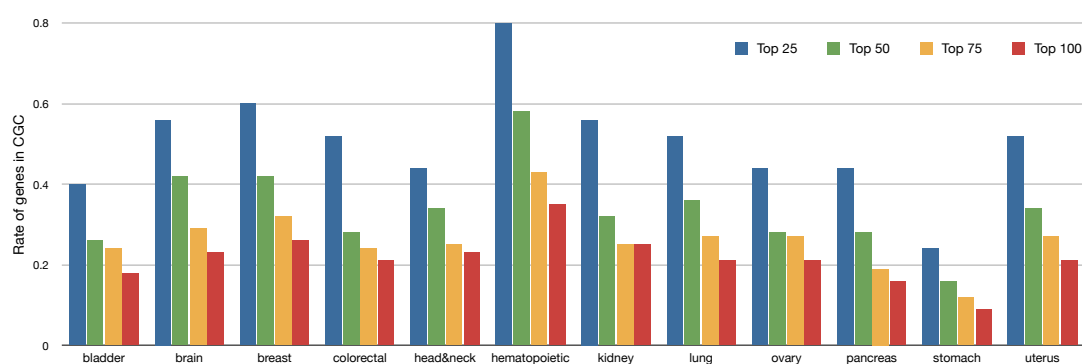

**Figure S5.** Rate of known cancer genes amongst the 25 top-ranking, the 50 top-ranking, the 75 top-ranking, and the 100 top-ranking OncodriveFM driver candidates in all cancer sites with data in IntOGen, except liver.

## References

1. Banerji, S. *et al.* Sequence analysis of mutations and translocations across breast cancer subtypes. *Nature* **486**, 405–409 (2012).
2. Stransky, N. *et al.* The mutational landscape of head and neck squamous cell carcinoma. *Science (New York, N.Y.)* **333**, 1157–60 (2011).
3. Chen, H.-J. *et al.* The role of microtubule actin cross-linking factor 1 (MACF1) in the Wnt signaling pathway. *Genes & development* **20**, 1933–45 (2006).
4. Shibata, T. *et al.* Cancer related mutations in NRF2 impair its recognition by Keap1-Cul3 E3 ligase and promote malignancy. *Proceedings of the National Academy of Sciences of the United States of America* **105**, 13568–73 (2008).
5. Hammerman, P. S. *et al.* Comprehensive genomic characterization of squamous cell lung cancers. *Nature* (2012).doi:10.1038/nature11404
6. Hörlein, A. J. *et al.* Ligand-independent repression by the thyroid hormone receptor mediated by a nuclear receptor co-repressor. *Nature* **377**, 397–404 (1995).
7. Stephens, P. J. *et al.* The landscape of cancer genes and mutational processes in breast cancer. *Nature* (2012).doi:10.1038/nature11017
8. Hollink, I. H. I. M. *et al.* NUP98/NSD1 characterizes a novel poor prognostic group in acute myeloid leukemia with a distinct HOX gene expression pattern. *Blood* **118**, 3645–56 (2011).
9. Douglas, J. *et al.* NSD1 mutations are the major cause of Sotos syndrome and occur in some cases of Weaver syndrome but are rare in other overgrowth phenotypes. *American journal of human genetics* **72**, 132–43 (2003).

10. Ellis, M. J. *et al.* Whole-genome analysis informs breast cancer response to aromatase inhibition. *Nature* (2012).doi:10.1038/nature11143
11. Cancer, T. & Atlas, G. Genomic and Epigenomic Landscapes of Adult De Novo Acute Myeloid Leukemia. *New England Journal of Medicine* 130501100016000 (2013).doi:10.1056/NEJMoa1301689
12. Dees, N. D. *et al.* MuSiC: Identifying mutational significance in cancer genomes. *Genome Research* (2012).doi:10.1101/gr.134635.111
13. Abdel-Wahab, O. *et al.* ASXL1 mutations promote myeloid transformation through loss of PRC2-mediated gene repression. *Cancer cell* **22**, 180–93 (2012).
14. Hahn, C. N. *et al.* Heritable GATA2 mutations associated with familial myelodysplastic syndrome and acute myeloid leukemia. *Nature genetics* **43**, 1012–7 (2011).
15. Pasquet, M. *et al.* High frequency of GATA2 mutations in patients with mild chronic neutropenia evolving to MonoMac syndrome, myelodysplasia, and acute myeloid leukemia. *Blood* **121**, 822–9 (2013).
16. Bődör, C. *et al.* Germ-line GATA2 p.THR354MET mutation in familial myelodysplastic syndrome with acquired monosomy 7 and ASXL1 mutation demonstrating rapid onset and poor survival. *Haematologica* **97**, 890–4 (2012).
17. Ostergaard, P. *et al.* Mutations in GATA2 cause primary lymphedema associated with a predisposition to acute myeloid leukemia (Emberger syndrome). *Nature genetics* **43**, 929–31 (2011).
18. Kazenwadel, J. *et al.* Loss-of-function germline GATA2 mutations in patients with MDS/AML or MonoMAC syndrome and primary lymphedema reveal a key role for GATA2 in the lymphatic vasculature. *Blood* **119**, 1283–91 (2012).
19. Futreal, P. A. *et al.* A census of human cancer genes. *Nature Reviews. Cancer* **4**, 177–183 (2004).

## ]Supplementary Note 2

### Use case 1: Browsing IntOGen-mutations web discovery tool

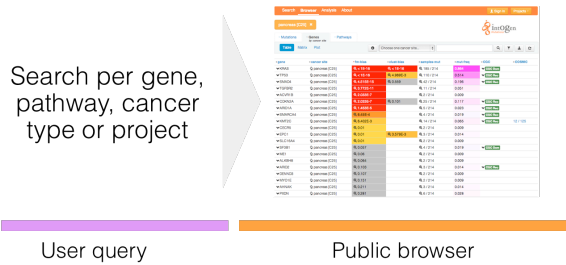

The systematic analysis of more than 4500 tumors across projects and tumor sites allows researchers to have a wide view of genes and pathways involved in tumorigenesis. Cancer researchers can search IntOGen-mutations to find out which genes are candidate drivers for a given tumor site or the likelihood that a given gene (or geneset) is a driver across different malignancies. This use case entails the

employment of the IntOGen-mutations web discovery tool as an aid to researchers in surveying genes or pathways that are related to tumorigenesis when mutated. We exemplify this use case with a survey of selected genes involved in the Hippo pathway. The goal is to find out all the ways this group of genes may be altered by mutations across the 31 projects currently in IntOGen.

One can start by obtaining the list of selected genes of the Hippo pathway from the KEGG HIPPO pathway<sup>1</sup> (hsa04390). They are: SMAD2, SMAD4, CTNNB1, APC, TGFBR2, CCND1. This list must be introduced in the google-like advanced search form of the IntOGen-mutations web discovery tool (<http://www.intogen.org/mutations>, see image).

Search Browser Analysis About Sign in Projects

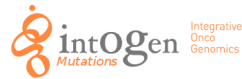

Genes Projects Cancer sites Pathways

SMAD2, SMAD4, CTNNB1, APC, TGFBR2

Examples: BRCA1, HIPPO pathway, ENSG00000133703

| APC                                                                                                                                                                                                                                                                                                                                   | CCND1 | CTNNB1 | SMAD2 | SMAD4 | TGFBR2 |
|---------------------------------------------------------------------------------------------------------------------------------------------------------------------------------------------------------------------------------------------------------------------------------------------------------------------------------------|-------|--------|-------|-------|--------|
| <p>gene ENSG00000134882<br/>           chr 5<br/>           start 112043195<br/>           end 112181936<br/>           strand 1<br/>           band q22.2<br/>           refseq NM_000038<br/>           description adenomatous polyposis coli<br/>           synonyms DP2, DP3, DP2.5, PPP1R46<br/>           accession M74088</p> |       |        |       |       |        |
| Candidate cancer drivers                                                                                                                                                                                                                                                                                                              |       |        |       |       |        |
| Mutation frequency per cancer site                                                                                                                                                                                                                                                                                                    |       |        |       |       |        |
| Mutation frequency per project                                                                                                                                                                                                                                                                                                        |       |        |       |       |        |
| Top 10 most recurrent mutations in the list of genes                                                                                                                                                                                                                                                                                  |       |        |       |       |        |

Feedback & Support

In the boxes below you can have an overview of the mutational-pattern of these genes in cancer.

**Candidate cancer drivers**

Table indicating the cancer sites in which those genes are detected as drivers

| gene   | candidate driver in                                      | CGC     |
|--------|----------------------------------------------------------|---------|
| CCND1  | corpus uteri                                             | CGC Dom |
| APC    | stomach, lung and bronchus, corpus uteri, colon          | CGC Rec |
| SMAD4  | lung and bronchus, pancreas, colon                       | CGC Rec |
| TGFBR2 | pancreas, oropharynx                                     |         |
| CTNNB1 | colon, brain, corpus uteri, liver and hepatic bile ducts | CGC Dom |
| SMAD2  | colon                                                    |         |

[Browse details...](#)

Clicking on “Candidate cancer drivers” you will have an overview of which of these genes are detected as drivers in different cancer sites.

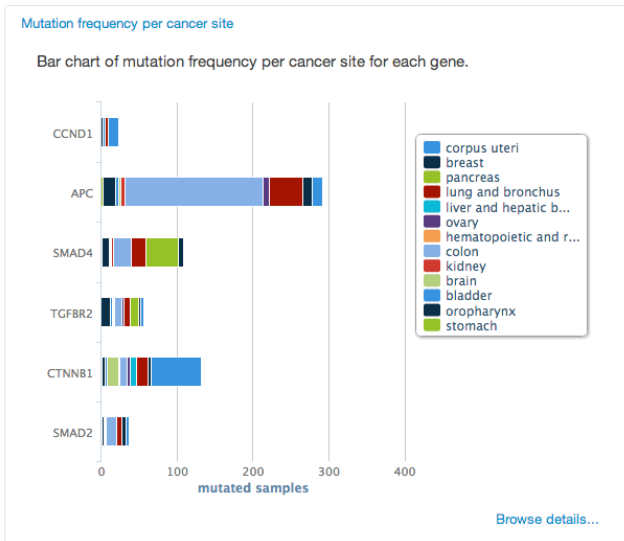

Clicking on “Mutation frequency per cancer site” you will see a bar chart showing the frequency of mutations of each gene in each cancer site. Similarly clicking on “Mutation frequency per project” you will see a similar bar chart showing the frequency of mutations of each gene in each project.

Top 10 most recurrent mutations in the list of genes

Table of most recurrent mutations in the list of genes.

| gene   | protein-change       | cancer site             | samples-mut | impact |
|--------|----------------------|-------------------------|-------------|--------|
| APC    | R1450*               | colon                   | 15 / 229    | High   |
| APC    | R858*, R876*         | colon                   | 11 / 229    | High   |
| CTNNB1 | S37Y, S30Y           | stomach                 | 1 / 22      | Medium |
| SMAD4  | fs 253               | stomach                 | 1 / 22      | High   |
| APC    | G452V, r.spl?, G470V | stomach                 | 1 / 22      | Medium |
| CTNNB1 | S30F, S37F           | stomach                 | 1 / 22      | Medium |
| APC    | fs 2650              | stomach                 | 1 / 22      | High   |
| CTNNB1 | A295D, A288D         | stomach                 | 1 / 22      | Medium |
| APC    | fs 1487              | stomach                 | 1 / 22      | High   |
| CTNNB1 | I35S, I28S           | liver and hepatic bi... | 1 / 24      | Medium |

Browse details...

Clicking on “Top 10 most frequent mutations in the list of genes” you will see details of the impact and frequency of these mutations.

Following the links in each of the boxes you are directed to the browser where you can see further details.

For example, by clicking on “Browse details...” link in the box of “Candidate cancer drivers” you will see a table of FM bias and CLUST bias integrated q-values of these genes in the 12 cancer sites with data in IntOGen-mutations.

The filter of the 6 Hippo pathway genes has been applied to the data and appears at the top left corner, as an orange box. This table view presents also the frequency of mutations of each gene across tumors of each site, and links to the Cosmic database<sup>2</sup>, if somatic mutations have been previously identified in the gene in cancer samples, or if it is annotated in the Cancer Gene Census<sup>3</sup>. With the mouse over the title of a column a tooltip with details of the data shown in that column is shown.

Search **Browser** Analysis About Sign in Projects

SMAD2, SMAD4, CTNNB1, APC, TGFBR2, CCND1 New selection...

intOGen Mutations

Mutations Genes *by cancer site* Pathways

Table **Matrix** Choose one cancer site... Q ↓ ↻

Click here to visualize this data as a heatmap

| +gene    | +cancer site              | ▼+fm-bias   | ▼+clust-bias | ▼+samples-mut | ▼+mut-freq | +CGC      | driver-category | +COSMIC |
|----------|---------------------------|-------------|--------------|---------------|------------|-----------|-----------------|---------|
| ▼ SMAD4  | ☞ pancreas                | 🔍 4.515E-15 | 🔍 0.559      | 🔍 42 / 214    | 0.196      | ▼ CGC Rec | HCD             |         |
| ▼ APC    | ☞ colon                   | 🔍 3.674E-13 | 🔍 0.301      | 🔍 182 / 229   | 0.795      | ▼ CGC Rec | HCD             |         |
| ▼ TGFBR2 | ☞ pancreas                | 🔍 3.772E-11 |              | 🔍 11 / 214    | 0.051      |           | HCD             |         |
| ▼ SMAD4  | ☞ colon                   | 🔍 1.47E-8   | 🔍 0.107      | 🔍 23 / 229    | 0.1        | ▼ CGC Rec | HCD             |         |
| ▼ CTNNB1 | ☞ brain                   | 🔍 2.631E-7  | 🔍 8.417E-4   | 🔍 16 / 492    | 0.033      | ▼ CGC Dom | HCD             |         |
| ▼ CTNNB1 | ☞ corpus uteri            | 🔍 6.004E-7  | 🔍 0.183      | 🔍 66 / 230    | 0.287      | ▼ CGC Dom | HCD             |         |
| ▼ SMAD2  | ☞ colon                   | 🔍 2.762E-6  | 🔍 0.06       | 🔍 14 / 229    | 0.061      |           | HCD             |         |
| ▼ CTNNB1 | ☞ colon                   | 🔍 1.6E-3    |              | 🔍 9 / 229     | 0.039      | ▼ CGC Dom | HCD             |         |
| ▼ CCND1  | ☞ corpus uteri            | 🔍 2.261E-3  |              | 🔍 13 / 230    | 0.057      | ▼ CGC Dom | HCD             |         |
| ▼ APC    | ☞ lung and bronchus       | 🔍 2.623E-3  |              | 🔍 44 / 665    | 0.066      | ▼ CGC Rec | HCD             |         |
| ▼ TGFBR2 | ☞ oropharynx              | 🔍 3.14E-3   | 🔍 2.122E-3   | 🔍 12 / 375    | 0.032      |           | HCD             |         |
| ▼ SMAD4  | ☞ lung and bronchus       | 🔍 5.506E-3  |              | 🔍 20 / 665    | 0.03       | ▼ CGC Rec | HCD             |         |
| ▼ APC    | ☞ stomach                 | 🔍 0.014     |              | 🔍 3 / 22      | 0.136      | ▼ CGC Rec | HCD             |         |
| ▼ APC    | ☞ corpus uteri            | 🔍 0.034     |              | 🔍 14 / 230    | 0.061      | ▼ CGC Rec | HCD             |         |
| ▼ TGFBR2 | ☞ colon                   | 🔍 0.127     |              | 🔍 9 / 229     | 0.039      |           | HCD             |         |
| ▼ SMAD4  | ☞ oropharynx              | 🔍 0.177     |              | 🔍 10 / 375    | 0.027      | ▼ CGC Rec | HCD             |         |
| ▼ CTNNB1 | ☞ lung and bronchus       | 🔍 0.275     |              | 🔍 15 / 665    | 0.023      | ▼ CGC Dom | HCD             |         |
| ▼ CTNNB1 | ☞ liver and hepatic bi... | 🔍 0.376     | 🔍 8.209E-4   | 🔍 9 / 24      | 0.375      | ▼ CGC Dom | HCD             |         |
| ▼ APC    | ☞ oropharynx              | 🔍 0.394     |              | 🔍 17 / 375    | 0.045      | ▼ CGC Rec | HCD             |         |
| ▼ APC    | ☞ breast                  | 🔍 0.46      |              | 🔍 12 / 1148   | 0.01       | ▼ CGC Rec | HCD             |         |

1 to 20 of (click to count) Next →

Feedback & Support

The same information may be visualized as a heatmap following the 'Matrix' link (see image above). Matrix visualization allows to rapidly grasping that these genes are FM biased mutational drivers across 6 cancer sites, pointing to a likely involvement of this pathway in tumorigenesis in at least tumors from these 6 sites. This heatmap, built on the jheatmap technology (<http://bg.upf.edu/jheatmap/>) developed in our group is interactive: rows and columns can be moved and sorted at will. The values shown at the heatmap can be changed to OncodriveCLUST pvalues, as can be changed the names of rows and columns, using the options in the left panel. This action completes the picture described above showing that CTNNB1 is also a putative driver (by CLUST bias) in liver.

Search **Browser** Analysis About Sign in Projects

SMAD2, SMAD4, CTNNB1, APC, TGFBR2, CCND1 New selection...

intOgen Mutations

Mutations
**Genes**  
by cancer site
Pathways

Table **Matrix** Help Download Share

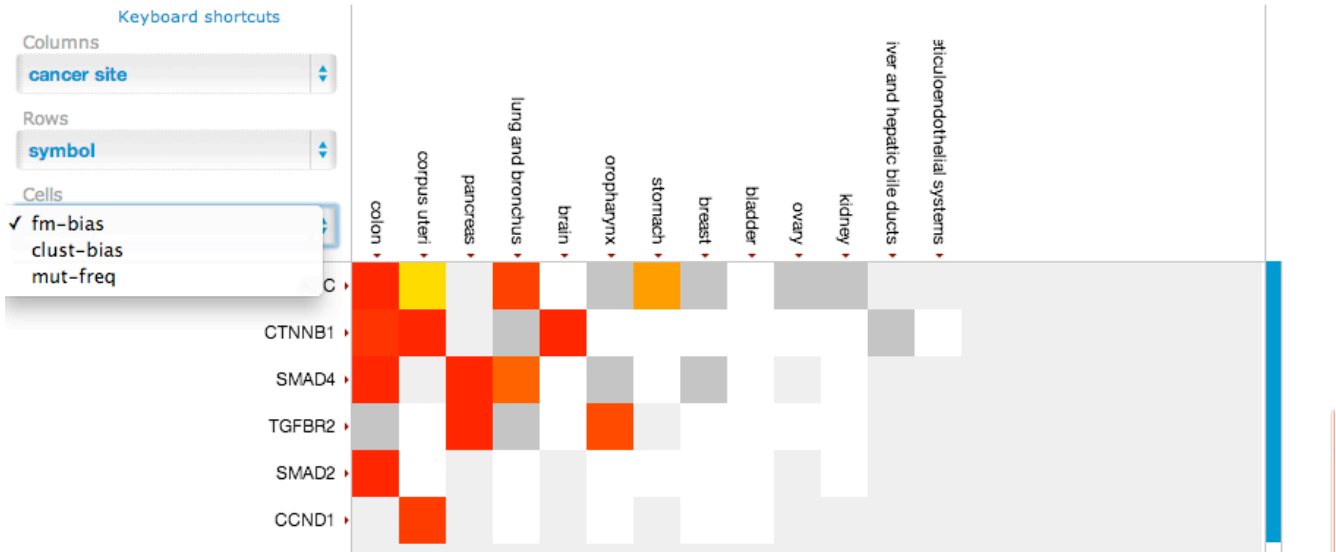

One question to ask from this data is the actual contributions of the projects to the integrated q-values shown in the heatmap. These can be retrieved by pulling down the menu at the Genes tab and selecting the 'by-project' information.

Search **Browser** Analysis About

SMAD2, SMAD4, CTNNB1, APC, TGFBR2, CCND1 New selection...

Mutations
**Genes**  
by cancer site
Pathways

Table **Matrix** Help Download Share

all
**by cancer site**
by project

Show genes by project

Then, for example by filtering the results for colon only it becomes apparent that whereas APC is significantly FM biased in both colorectal adenocarcinoma projects<sup>4,5</sup>, SMAD2, SMAD4 and CTNNB1 are so only in the TCGA colorectal dataset. The combination, nevertheless highlights them as significant in this site because their FM bias p-values in the Johns Hopkins colorectal adenocarcinoma dataset are sufficiently low.

Search **Browser** Analysis About Sign in Projects

SMAD2, SMAD4, CTNNB1, APC, TGFBR2, CCND1 colon New selection...

intOGen Mutations

Mutations
Genes by project
Pathways

Table
Matrix
Choose one project...
Q
↓
↺

Click here to see more information about this project and to filter by it

| +gene   | +project-name           | +cancer site | ▼+fm-bias | ▼+clust-bias | ▼+samples-mut | ▼+mut-freq |
|---------|-------------------------|--------------|-----------|--------------|---------------|------------|
| ▼APC    | COLORECTAL ADENO TCG... | colon        | < 1E-16   | 0.017        | 158 / 193     | 0.819      |
| ▼SMAD4  | COLORECTAL ADENO TCG... | colon        | < 1E-16   | 0.099        | 19 / 193      | 0.098      |
| ▼APC    | COLORECTAL ADENO JHU    | colon        | 2.665E-13 | 0.893        | 24 / 36       | 0.667      |
| ▼SMAD2  | COLORECTAL ADENO TCG... | colon        | 8.987E-6  | 0.056        | 11 / 193      | 0.057      |
| ▼CTNNB1 | COLORECTAL ADENO TCG... | colon        | 1.463E-3  |              | 9 / 193       | 0.047      |
| ▼SMAD4  | COLORECTAL ADENO JHU    | colon        | 9.08E-3   |              | 4 / 36        | 0.111      |
| ▼SMAD2  | COLORECTAL ADENO JHU    | colon        | 0.095     |              | 3 / 36        | 0.083      |
| ▼TGFBR2 | COLORECTAL ADENO TCG... | colon        | 0.116     |              | 6 / 193       | 0.031      |
| ▼TGFBR2 | COLORECTAL ADENO JHU    | colon        | 0.671     |              | 3 / 36        | 0.083      |

In IntOGen-mutations it is also possible to view details of individual mutations, such as its frequency and its predicted impact. To do so, one can first filter the results of only one dataset, say the TCGA colorectal adenocarcinoma dataset (see above), and then go to the Mutations 'by project' tab. A table with mutations is shown (see first image in next page). By clicking at a column header the table is sorted by the values of this column. For instance, to find the most frequency mutations, click the header of samples-mut. The mutation in the top is the most frequent one in this dataset, observed in 13 samples out of 193 samples analyzed. The predicted impact of the mutation is high. By clicking at the impact box, the user obtains details of the consequence of the mutation and its impact in protein function.

One can also visualize the mutational pattern per gene in a heatmap, which also allows checking whether mutations in these genes that act as part of the same pathway tend to be mutually exclusive across tumor samples of the same project. To do so, click on the 'Matrix' view button. Mutations in these genes across all tumor types in the dataset are then visualized as in interactive heatmap (see second image in next page), the color indicating the MutationAssessor scores (colors toward red a high impact). By default, these mutations appear sorted across the genes in a mutually exclusive manner. In this case, the heatmap shows that mutations in SMAD2, SMAD4, CTNNB1 and TGFBR2 tend to appear in the same samples where APC is mutated, underlining the likely character of founders of somatic mutations in APC in colorectal carcinomas.



Search **Browser** Analysis About Sign in Projects ▾

SMAD2, SMAD4, CTNNB1, APC, TGFB2, CCND1 ✕ COLORECTAL ADENO TCGA ✕ New selection...

intOgen Mutations

Mutations by project
Genes
Pathways

Table
Matrix
Choose one project...
Q
Download
Share

Click here to visualize the mutational pattern heatmap

Mutation frequency

Predicted impact of the mutation

| variant           | gene  | protein-change | project-name            | cancer site | samples-mut | mut-freq | impact | references |
|-------------------|-------|----------------|-------------------------|-------------|-------------|----------|--------|------------|
| 5:112175639:~:C/T | APC   | R1450*         | COLORECTAL ADENO TCG... | colon       | 13 / 193    | 0.067    | High   | C S        |
| 5:112173917:~:C/T | APC   | R858*, R876*   | COLORECTAL ADENO TCG... | colon       | 11 / 193    | 0.057    | High   | C S        |
| 5:112128143:~:C/T | APC   | R216*          | COLORECTAL ADENO TCG... | colon       | 7 / 193     | 0.036    | High   | C S        |
| 5:112173704:~:C/T | APC   | R787*, R805*   | COLORECTAL ADENO TCG... | colon       | 6 / 193     | 0.031    | High   | C          |
| 5:112116592:~:C/T | APC   | R213*, R223*   | COLORECTAL ADENO TCG... | colon       | 5 / 193     | 0.026    | High   | C          |
| 18:48591919:~:G/A | SMAD4 | R361H, R265H   | COLORECTAL ADENO TCG... | colon       | 5 / 193     | 0.026    | Medium | C          |
| 5:112175423:~:C/T | APC   | Q1378*         | COLORECTAL ADENO TCG... | colon       | 4 / 193     | 0.021    | High   | C S        |
| 5:112164616:~:C/T | APC   | R546*, R564*   | COLORECTAL ADENO TCG... | colon       | 4 / 193     | 0.021    | High   | C S        |
| 5:112175390:~:C/T | APC   | Q1367*         | COLORECTAL ADENO TCG... | colon       | 4 / 193     | 0.021    | High   | C S        |
| 5:112174631:~:C/T | APC   | R1096*, R1114* | COLORECTAL ADENO TCG... | colon       | 3 / 193     | 0.016    | High   | C S        |
| 5:112175411:~:G/T | APC   | E1374*         | COLORECTAL ADENO TCG... | colon       | 3 / 193     | 0.016    | High   | C          |
| 5:112175171:~:C/T | APC   | Q1294*         | COLORECTAL ADENO TCG... | colon       | 3 / 193     | 0.016    | High   | C          |
| 5:112175507:~:C/T | APC   | Q1406*         | COLORECTAL ADENO TCG... | colon       | 3 / 193     | 0.016    | High   | C          |
| 5:112175207:~:G/T | APC   | E1306*         | COLORECTAL ADENO TCG... | colon       | 3 / 193     | 0.016    | High   | C S        |
| 5:112128191:~:C/T | APC   | R232*          | COLORECTAL ADENO TCG... | colon       | 3 / 193     | 0.016    | High   | C          |
| 5:112151261:~:C/T | APC   | R302*, R284*   | COLORECTAL ADENO TCG... | colon       | 3 / 193     | 0.016    | High   | C S        |
| 5:112175351:~:T/- | APC   | fs 1354        | COLORECTAL ADENO TCG... | colon       | 2 / 193     | 0.01     | High   |            |
| 18:45368211:~:G/C | SMAD2 | *464S, *434S   | COLORECTAL ADENO TCG... | colon       | 2 / 193     | 0.01     | High   |            |
| 5:112175303:~:C/T | APC   | Q1338*         | COLORECTAL ADENO TCG... | colon       | 2 / 193     | 0.01     | High   | C S        |
| 5:112174223:~:C/T | APC   | Q978*, Q960*   | COLORECTAL ADENO TCG... | colon       | 2 / 193     | 0.01     | High   | C          |

1 to 20 of (click to count) Next →

Feedback & Support

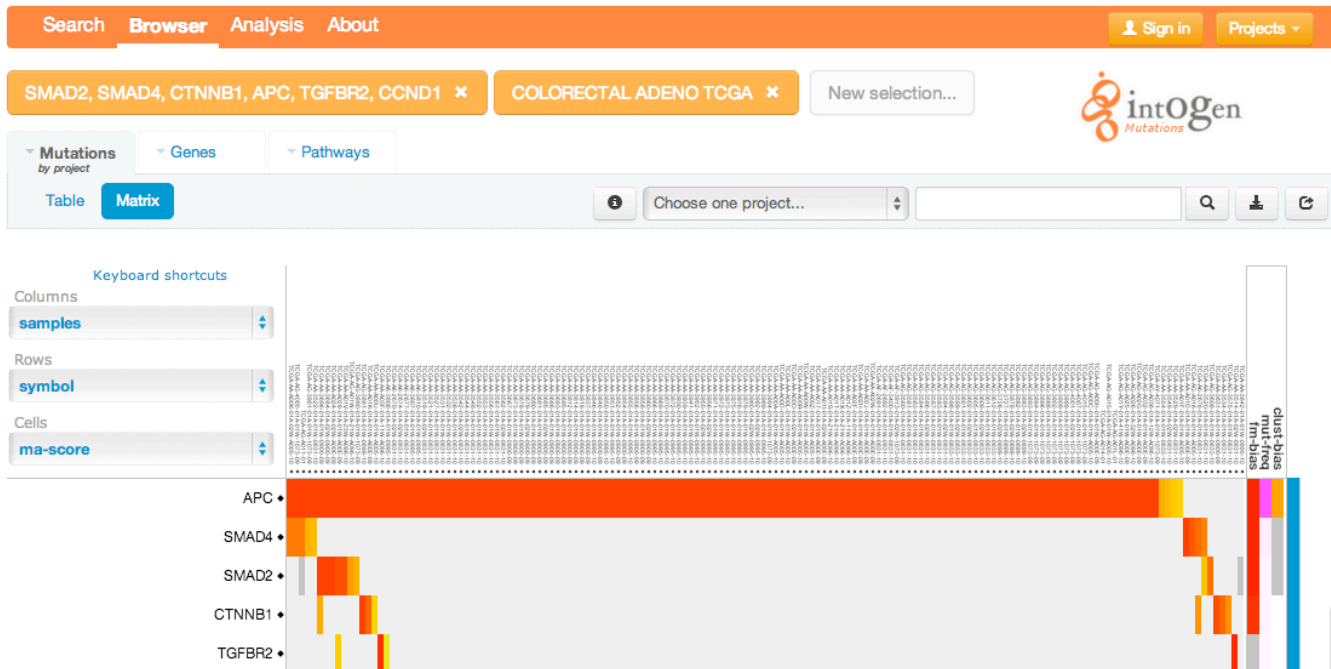

## References

1. Kanehisa, M. & Goto, S. KEGG: kyoto encyclopedia of genes and genomes. *Nucleic Acids Research* **28**, 27–30 (2000).
2. Forbes, S. A. *et al.* COSMIC: mining complete cancer genomes in the Catalogue of Somatic Mutations in Cancer. *Nucleic Acids Research* **39**, D945–950 (2010).
3. Futreal, P. A. *et al.* A census of human cancer genes. *Nature Reviews. Cancer* **4**, 177–183 (2004).
4. Muzny, D. M. *et al.* Comprehensive molecular characterization of human colon and rectal cancer. *Nature* **487**, 330–337 (2012).
5. Wood, L. D. *et al.* The genomic landscapes of human breast and colorectal cancers. *Science (New York, N.Y.)* **318**, 1108–1113 (2007).

## Supplementary Note 3

### Use case 2. Analysis of somatic mutations in a cohort of tumors

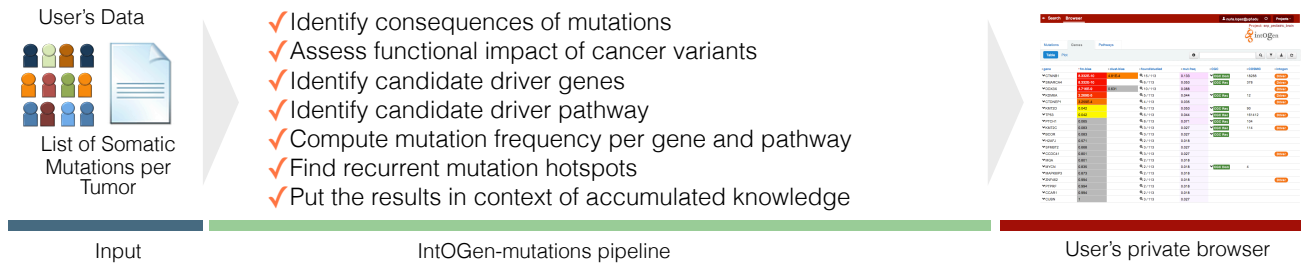

The IntOGen-mutations platform is the first tool that unites a pipeline to analyze the somatic mutations identified across a cohort of tumor samples with a web discovery tool containing accumulated knowledge on the role of somatic mutations in tumors obtained from systematic equivalent analysis of datasets of resequenced tumor genomes. Therefore, one important use of IntOGen-mutations is to identify likely driver genes across a cohort of tumors and compare them with the list of previously detected likely drivers in the same cancer site or in general that is provided by the IntOGen-mutations web discovery tool.

This use case consists in the analysis of the catalog of somatic mutations detected across a dataset of tumor samples aimed at identifying putative driver genes. To illustrate this use case, we employed a dataset of 931 high-confidence somatic mutations identified across 37 medulloblastoma tumor samples (Robinson *et al. Nature* **488**, 43–8 (2012)). The list of mutations was submitted to the online version of the IntOGen-mutations cohort analysis pipeline (<http://www.intogen.org/mutations/analysis>).

The screenshot shows the IntOGen Mutations web interface. The top navigation bar includes 'Search', 'Browser', 'Analysis', and 'About'. The user is logged in as 'maria.lopez@upf.edu'. The main content area is titled 'IntOGen Mutations 2.2-dev' and 'To interpret catalogs of cancer somatic mutations'. The 'Cohort analysis' section contains the following fields:

- Mutations file:** A text input field containing 'medulloblastoma\_cohort\_tier1\_mutations.muts.txt'. Below it is a link to the file format and a 'Load ...' button.
- Analysis name:** A text input field containing 'medulloblastoma - Robinson et al'. Below it is a note: 'A unique name that identifies this analysis'.
- Genome assembly:** Radio buttons for 'hg18 (NCBI36)' and 'hg19 (GRCh37)'. 'hg19 (GRCh37)' is selected.

Below these fields is an 'Advanced options' section and a 'Start analysis' button. A vertical 'Feedback & Support' button is located on the right side of the form.

The pipeline then runs on the mutations in the dataset and upon completion, an IntOGen-mutations-like website with the results is generated which can be accessed through the 'Browse' button at the right of the project *md\_tier1* progress bar.

The screenshot shows the IntOGen Mutations web interface. At the top, there is a navigation bar with links for Home, Analysis, Results, Documentation, and Download. Below this, the title 'IntOGen Mutations 2.2-dev' is displayed, followed by the subtitle 'To interpret catalogs of cancer somatic mutations'. A 'Refresh' button is located in the top right corner. The main content area features a project progress bar for 'meduloblastoma\_-\_Robinson\_et\_al', which is marked as 'finished'. Below the project name, it shows the creation and completion times: 'Created on 18:32:30, started on 18:34:30, finished on 18:34:32, elapsed 0:00:02.143003'. Three buttons are visible: 'Download', 'Browse', and 'Remove'. Red arrows point from the 'Download' and 'Browse' buttons to text labels: 'Click here to download results as text files' and 'Click here to browse results' respectively.

The website containing the results of the analysis launched by the user is built on top of the Onexus system (<http://www.onexus.org/>) and has exactly the same configuration and design as the IntOGen-mutations web discovery tool. The only differences are the colors in the design of the page and the name of the website visible at the top right corner of the pages. A series of three reports added to the main page of the website generated by the pipeline guide the user in the interpretation of the main results of the analysis.

The screenshot shows the IntOGen web interface. At the top, there is a dark red navigation bar with a search icon, the text 'Search Browser', a user profile icon with the email 'nuria.lopez@upf.edu', a power icon, and a 'Projects' dropdown menu. Below the navigation bar, the project name 'Project: meduloblastoma\_-\_Robinson\_et\_al' is displayed. The main content area features the IntOGen logo, which consists of an orange stylized 'i' and 'o' followed by the text 'intOGen Integrative Onco Genomics'. Below the logo, there are radio buttons for 'Genes' (selected) and 'Pathways'. A search input field is present, followed by a search icon and a menu icon. Below the search field, there are examples: 'Examples: BRCA1, NM\_000314, ENSG00000133703'. On the right side, there is a vertical orange button labeled 'Feedback & Support'. At the bottom, there is a 'General links' section with four buttons: 'View matrix of mutations per gene and sample', 'Driver genes in the cohort', 'Mutations in candidate driver genes', and 'Driver pathways in the cohort'.

**Driver genes in the cohort**

List of most frequently mutated candidate drivers in the cohort

| gene   | fm-bias  | clust-bias | mut-freq | CGC     | Intogen |
|--------|----------|------------|----------|---------|---------|
| CTNNB1 | 8.859E-3 |            | 0.108    | CGC Dom | Driver  |
| DDX3X  | 2.72E-5  |            | 0.108    |         | Driver  |
| KDM6A  | 8.859E-3 |            | 0.081    | CGC Rec | Driver  |
| GPAM   | 0.015    |            | 0.054    |         |         |
| CHD7   | 0.015    |            | 0.054    |         |         |
| SF3B1  | 0.037    |            | 0.054    | CGC Dom | Driver  |

[Browse details...](#)

The box “Driver genes in the cohort” presents a list of candidate driver genes in the cohort of tumors under analysis. The report directly highlights the genes that have been previously found to be drivers in IntOGen or which are annotated in the CGC.

**Mutations in candidate driver genes**

List of the top 10 most frequent mutations in candidate driver genes in the cohort

| gene   | protein-change           | found/studied | impact |
|--------|--------------------------|---------------|--------|
| KDM6A  | fs 298                   | 1 / 37        | High   |
| KDM6A  | G1066D, r.spl?, G743D... | 1 / 37        | Medium |
| DDX3X  | G286V, G302V             | 1 / 37        | High   |
| CTNNB1 | D32G, D25G               | 1 / 37        | Medium |
| CTNNB1 | G27R, G34R               | 1 / 37        | Medium |
| DDX3X  | M354R, M370R             | 1 / 37        | Medium |
| CTNNB1 | S26Y, S33Y               | 1 / 37        | Medium |
| DDX3X  | G309E, G325E             | 1 / 37        | Medium |
| CTNNB1 | S33F, S26F               | 1 / 37        | Medium |
| DDX3X  | N290=, T259M, T275M      | 1 / 37        | High   |

[Browse details...](#)

The box “Mutations in candidate cancer driver genes” summarizes the most frequent mutations in candidate driver genes in the cohort.

**Driver pathways in the cohort**

Mutational frequency of the top 10 driver pathways in the cohort

| pathway                      | fm-bias  | found/studied | mut-freq |
|------------------------------|----------|---------------|----------|
| Pathways in cancer           | 5.673E-5 | 19 / 37       | 0.514    |
| Epstein-Barr virus infection | 0.035    | 15 / 37       | 0.405    |
| HTLV-I infection             | 7.754E-5 | 13 / 37       | 0.351    |
| Focal adhesion               | 4.674E-3 | 13 / 37       | 0.351    |
| Wnt signaling pathway        | 3.856E-5 | 11 / 37       | 0.297    |

[Browse details...](#)

The box “Driver pathways in the cohort” focuses on the top FM biased pathways indicating also the number of samples with somatic mutations in genes of the pathway.

By clicking on “View matrix of mutations per gene and sample” the user is taken directly to the heatmap of all the mutations detected across tumor samples, which was described in the Use Case 1.

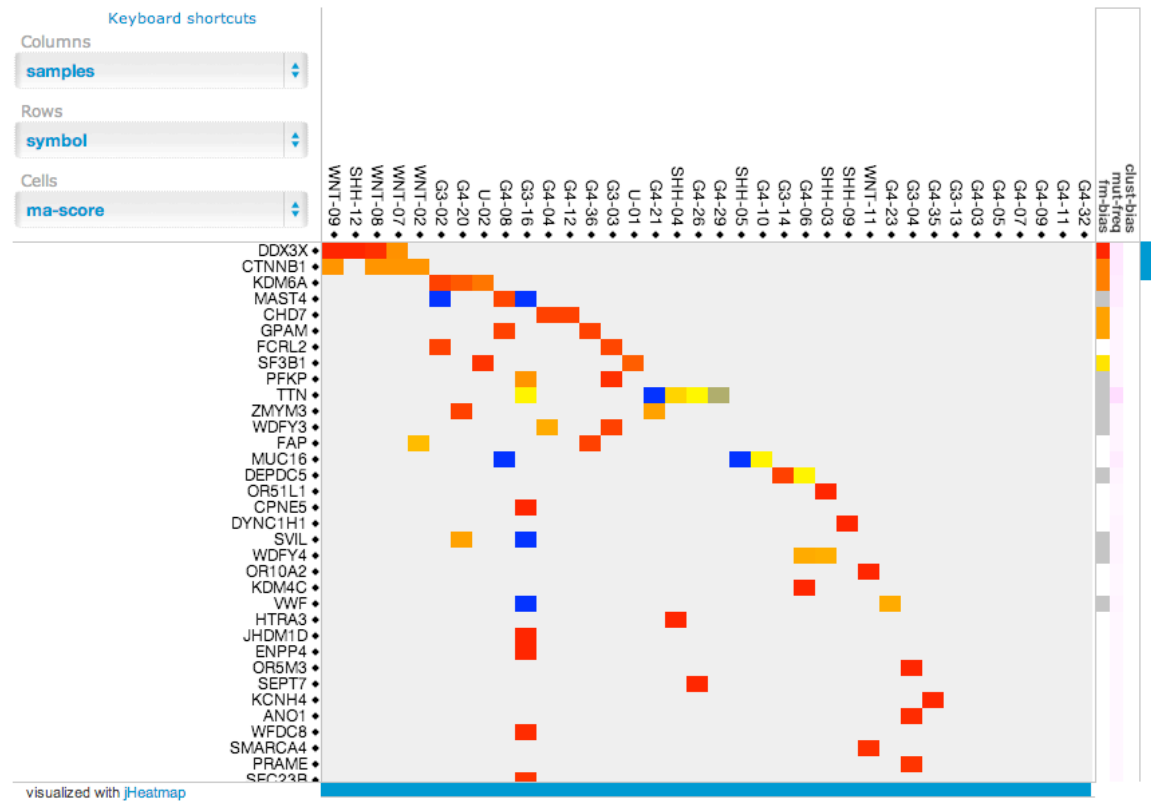

It is then possible to navigate, for instance to the Genes tab, where the user obtains information on the genes that have identified as putative drivers by OncodriveFM and/or OncodriveCLUST in the dataset under analysis. The rightmost column in this visualization marks genes that are putative drivers in at least one cancer site currently included within the IntOGen-mutations web discovery tool. From this visualization user learns that DDX3X, CTNNB1, KDM6A, GPAM, CHD7 and SF3B1 are top ranking FM biased genes in this dataset across the whole range of mutation frequency.

← Search **Browser** nuria.lopez@upf.edu Projects

Project: medulloblastoma\_-\_Robinson\_et\_al

New selection...

Mutations Genes Pathways

Table

| +gene           | +fm-bias | +clust-bias | +found/studied | +mut-freq | +CGC    | driver-category | +COSMIC | +intogen |
|-----------------|----------|-------------|----------------|-----------|---------|-----------------|---------|----------|
| DDX3X           | 2.72E-5  | 4 / 37      | 0.108          |           |         | CD              |         | Driver   |
| CTNMB1          | 8.859E-3 | 4 / 37      | 0.108          |           | CGC Dom | HCD             | 18288   | Driver   |
| KDM6A           | 8.859E-3 | 3 / 37      | 0.081          |           | CGC Rec | HCD             | 12      | Driver   |
| GPAM            | 0.015    | 2 / 37      | 0.054          |           |         |                 |         |          |
| CHD7            | 0.015    | 2 / 37      | 0.054          |           |         | CD              |         |          |
| SF3B1           | 0.037    | 2 / 37      | 0.054          |           | CGC Dom | HCD             | 388     | Driver   |
| ZMYM3           | 0.114    | 2 / 37      | 0.054          |           |         |                 |         |          |
| WDFY3           | 0.176    | 2 / 37      | 0.054          |           |         |                 |         |          |
| PFFK1           | 0.244    | 2 / 37      | 0.054          |           |         |                 |         |          |
| WDFY4           | 0.245    | 2 / 37      | 0.054          |           |         |                 |         |          |
| DEPDC5          | 0.426    | 2 / 37      | 0.054          |           |         |                 |         | Driver   |
| DNAH14          | 0.542    | 2 / 37      | 0.054          |           |         |                 |         | Driver   |
| IFIT3           | 0.922    | 2 / 37      | 0.054          |           |         |                 |         |          |
| MAST4           | 0.985    | 3 / 37      | 0.081          |           |         |                 |         |          |
| VWF             | 0.985    | 2 / 37      | 0.054          |           |         |                 |         |          |
| SVIL            | 0.985    | 2 / 37      | 0.054          |           |         | CD              |         |          |
| TTN             | 0.985    | 6 / 37      | 0.162          |           |         |                 |         | Driver   |
| ENSG00000200340 |          | 1 / 37      | 0.027          |           |         |                 |         |          |
| ENSG00000264573 |          | 4 / 37      | 0.108          |           |         |                 |         |          |
| RNY1P7          |          | 1 / 37      | 0.027          |           |         |                 |         |          |

Feedback & Support

The 'Driver' links in the 'intogen' column in the Table visualization connects the user directly with the information on each gene in the IntOGen-mutations web discovery tool. For instance, following the link that corresponds to DDX3X in this dataset, the user learns that it is indeed significantly FM biased in brain tumors, despite its relatively low mutational frequency.

Search **Browser** Analysis About nuria.lopez@upf.edu Projects

DDX3X New selection...

Mutations Genes *by cancer site* Pathways

Table Matrix Choose one cancer site...

| +gene | +cancer site            | +fm-bias | +clust-bias | +samples-mut | +mut-freq | +CGC | driver-category | +COSMIC |
|-------|-------------------------|----------|-------------|--------------|-----------|------|-----------------|---------|
| DDX3X | brain                   | 2.631E-7 | 0.744       | 12 / 492     | 0.024     |      | CD              |         |
| DDX3X | corpus uteri            | 0.061    |             | 6 / 230      | 0.026     |      | CD              |         |
| DDX3X | hematopoietic and re... | 0.141    |             | 2 / 395      | 0.005     |      | CD              |         |
| DDX3X | oropharynx              |          |             | 4 / 375      | 0.011     |      | CD              |         |
| DDX3X | pancreas                |          |             | 1 / 214      | 0.005     |      | CD              |         |
| DDX3X | lung and bronchus       |          |             | 8 / 665      | 0.012     |      | CD              |         |
| DDX3X | breast                  |          |             | 7 / 1148     | 0.006     |      | CD              |         |
| DDX3X | ovary                   |          |             | 1 / 316      | 0.003     |      | CD              |         |
| DDX3X | kidney                  |          |             | 3 / 417      | 0.007     |      | CD              |         |
| DDX3X | bladder                 |          |             | 2 / 98       | 0.02      |      | CD              |         |

Click here to see results at the level of projects

Going deeper to the per-project information reveals that the significance of DDX3X is due to its accumulation of functional mutations in the BRAIN PEDIATRIC DKFZ dataset, which comprises pediatric medulloblastoma cases.

DDX3X × brain × New selection... Click here to make a new selection of genes

intOGen Mutations

Mutations Genes by project Pathways

Table Matrix Choose one project... [Search] [Download] [Share]

| +gene   | +project-name             | +cancer site | ▼ -fm-bias | ▼ +clust-bias | ▼ +samples-mut | ▼ +mut-freq |
|---------|---------------------------|--------------|------------|---------------|----------------|-------------|
| ▼ DDX3X | ▼ BRAIN PEDIATRIC DKFZ    | 👤 brain      | 4.658E-9   | 0.631         | 🔍 10 / 113     | 0.088       |
| ▼ DDX3X | ▼ BRAIN GLIOBLASTOMA T... | 👤 brain      |            |               | 🔍 2 / 290      | 0.007       |

If the candidate driver genes detected in this cohort (DDX3X, CTNNB1, KDM6A, GPAM, CHD7, SF3B1) are introduced as a new selection of genes in IntOGen-mutations web discovery tool we can see that three of these genes (DDX3X, CTNNB1 and KDM6A) pop up as likely candidate drivers of pediatric medulloblastomas.

DDX3X, CTNNB1, KDM6A, GPAM, CHD7, SF3B1 × brain × New selection...

intOGen Mutations

Mutations Genes by project Pathways

Table Matrix Choose one project... [Search] [Download] [Share]

| +gene    | +project-name             | +cancer site | ▼ -fm-bias | ▼ +clust-bias | ▼ +samples-mut | ▼ +mut-freq |
|----------|---------------------------|--------------|------------|---------------|----------------|-------------|
| ▼ CTNNB1 | ▼ BRAIN PEDIATRIC DKFZ    | 👤 brain      | 2.4E-13    | 3.607E-4      | 🔍 15 / 113     | 0.133       |
| ▼ DDX3X  | ▼ BRAIN PEDIATRIC DKFZ    | 👤 brain      | 4.658E-9   | 0.631         | 🔍 10 / 113     | 0.088       |
| ▼ KDM6A  | ▼ BRAIN PEDIATRIC DKFZ    | 👤 brain      | 5.105E-5   |               | 🔍 5 / 113      | 0.044       |
| ▼ CHD7   | ▼ BRAIN GLIOBLASTOMA T... | 👤 brain      |            |               | 🔍 3 / 290      | 0.01        |
| ▼ KDM6A  | ▼ BRAIN GLIOBLASTOMA T... | 👤 brain      |            |               | 🔍 3 / 290      | 0.01        |
| ▼ DDX3X  | ▼ BRAIN GLIOBLASTOMA T... | 👤 brain      |            |               | 🔍 2 / 290      | 0.007       |
| ▼ SF3B1  | ▼ BRAIN GLIOBLASTOMA T... | 👤 brain      |            |               | 🔍 2 / 290      | 0.007       |
| ▼ CTNNB1 | ▼ BRAIN GLIOBLASTOMA T... | 👤 brain      |            |               | 🔍 1 / 290      | 0.003       |



## Supplementary Note 4

### Use case 3. Analysis of somatic mutations in a tumor of an individual patient

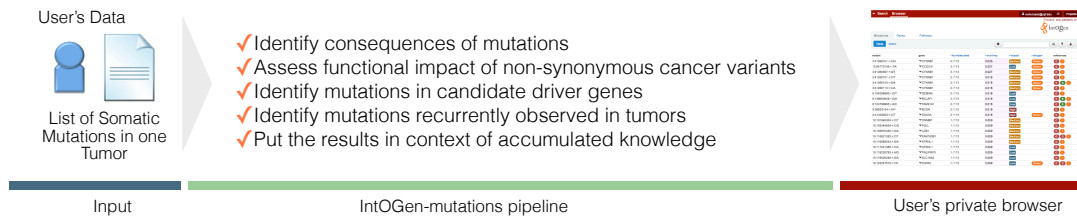

The IntOGen-mutations pipeline can be used to rank the somatic mutations identified in the tumor of an individual patient. Researchers with a list of mutations detected in a tumor can identify functionally impacting mutations, find mutations affecting cancer driver genes, and identify any mutations in the patient that have been previously observed in tumors. All this information can help to suggest which genes might have driven tumorigenesis in the patient, with the final aim of informing a personalized approach to treatment.

We exemplify this use case with the list of somatic mutations detected in the exome of a metastatic colon cancer<sup>1</sup>. The user starts by submitting these mutations to the online version of the IntOGen-mutations single tumor analysis pipeline at <http://www.intogen.org/mutations/analysis> and launching it. (For exemplary purposes, let's name this project *crc\_persmed*.)

Home Analysis Results Documentation Download

## IntOGen Mutations 2.2-dev

To interpret catalogs of cancer somatic mutations

### Single tumor analysis

**Mutations file**

File with mutations per sample according to [this format](#)

**Analysis name**

A unique name that identifies this analysis

**Genome assembly**

hg18 (NCBI36)

hg19 (GRCh37)

# IntOGen Mutations 2.2-dev

To interpret catalogs of cancer somatic mutations

Refresh

**meduloblastoma - Robinson et al** finished

Created on 18:32:30, started on 18:34:30, finished on 18:34:32, elapsed 0:00:02.143003

[Download](#)
[Browse](#)
[Remove](#)

**crc\_persmed** finished

Created on 19:27:44, started on 19:28:55, finished on 19:28:56, elapsed 0:00:01.792776

[Download](#)
[Browse](#)
[Remove](#)

Click here to download results as text files

Click here to browse results

When the analysis is completed the user can download the results in the form of text files or browse the results. Upon entrance in the browser, the user is directed to the only available tab in this case, Mutations.

← Browser
nuria.lopez@upf.edu Projects

Project: crc\_persmed

New selection...

Mutations

Table
Matrix

| variant            | gene              | protein-change           | +impact | -intogen | +CGC      | driver-category | references      |
|--------------------|-------------------|--------------------------|---------|----------|-----------|-----------------|-----------------|
| 4:123237887:+:G/T  | ▼ KIAA1109        | E3514*, E1472*, E197*... | High    | Driver   |           | HCD             |                 |
| 1:115256529:+:T/A  | ▼ NRAS            | Q61L                     | Medium  | Driver   | ▼ CGC Dom | HCD             | C I             |
| 17:7578406:+:C/T   | ▼ TP53            | R82H, R43H, R175H        | High    | Driver   | ▼ CGC Rec | HCD             | C C C C C C S I |
| 2:70315174:+:T/A   | ▼ PCBP1           | L100Q                    | Medium  | Driver   |           | HCD             | I               |
| 1:39927647:+:G/A   | ▼ MACF1           | A5147T, A254T, A48T...   | Medium  | Driver   |           | CD              |                 |
| 5:31995694:+:C/T   | ▼ PDZD2           | R331*                    | High    |          |           |                 |                 |
| 16:70161159:+:G/T  | ▼ PDPR            | r.sp1?                   | Unknown |          |           |                 | S               |
| 1:144952220:+:C/T  | ▼ PDE4DIP         | A233T, A170T, A167T...   | Low     |          | ▼ CGC Dom |                 | S               |
| 21:47754524:+:G/A  | ▼ PCNT            | V161I                    | Low     |          |           |                 |                 |
| 2:70315174:+:T/A   | ▼ ENSG00000233060 |                          | None    |          |           |                 | I               |
| 11:4903673:+:T/C   | ▼ OR51H2P         |                          | None    |          |           |                 |                 |
| 9:119093575:+:G/T  | ▼ PAPPA           | W1067L, W105L            | Medium  |          |           |                 |                 |
| 2:70315174:+:T/A   | ▼ PCBP1-AS1       |                          | None    |          |           |                 | I               |
| 6:64356623:+:T/C   | ▼ PHF3            | L56P, L9P                | Low     |          |           |                 |                 |
| 10:7269848:+:G/A   | ▼ SFMBT2          | A391V                    | Medium  |          |           |                 | I               |
| 10:112541250:+:G/A | ▼ RBM20           | G295R                    | Low     |          |           |                 | E               |
| 2:114392655:+:G/A  | ▼ RABL2A          | R82Q                     | Low     |          |           |                 | S               |
| 10:27702423:+:G/T  | ▼ PTCHD3          | Q253K                    | Low     |          |           |                 |                 |
| 19:43373033:+:C/T  | ▼ PSG1            | R288Q, R195Q             | Low     |          |           |                 | S               |
| 19:54407979:+:G/A  | ▼ PRKCG           | V583M                    | Low     |          |           |                 | S               |

1 to 20 of (click to count)
Next →

Feedback & Support

This table gives information on the effect of each mutation over the encoded protein, information about the evidences of the affected gene to be involved in cancer, and reports if the mutations have already been reported in IntOGen or other databases (references columns).

The table is sorted to show on top those that occur in IntOGen-mutations drivers. To gain further insight on the possible involvement of these mutations in driver genes in the process tumorigenesis, the user may follow the links in the Impact column. These classify the likely impact of mutations on protein function into four categories ranging from None to High, based on their consequence types and the transFIC<sup>2</sup> MutationAssessor<sup>3</sup> scores of non-synonymous mutations. This way, the user learns that the mutation detected on TP53 causes an aminoacid change in several of its transcripts with a putative high effect on the protein product.

Mutation consequence types

SNV 17:7578406:C/T  
Gene ENSG00000141510

**High** ENST00000420246 (P53\_HUMAN) - missense\_variant

Protein ENSP00000391127  
Uniprot P53\_HUMAN  
AA change R/H  
Protein position 175

|      | class  | score | transFIC <sup>2</sup> |
|------|--------|-------|-----------------------|
| SIFT | Medium | 0.89  | 1.302                 |
| PPH2 | Low    | 0.236 | -0.698                |
| MA   | High   | 3.345 | 4.756                 |

**High** ENST00000514944 (P53\_HUMAN) - missense\_variant

**High** ENST00000455263 (P53\_HUMAN) - missense\_variant

**High** ENST00000509690 (P53\_HUMAN) - missense\_variant

Close

The actionable mutation detected by the original report falls on the NRAS known driver possibly with an important effect on the activity of the protein. Following the 'Driver' link in the IntOGen column that corresponds to this mutation, the user learns that in IntOGen NRAS has been deemed significantly FM biased and CLUST biased in colorectal adenocarcinoma, as well as in other sites.

Mutation consequence types

SNV 1:115256529:T/A  
Gene ENSG00000213281

**Medium** ENST00000369535 (RAS\_N\_HUMAN) - missense\_variant

Protein ENSP00000358548  
Uniprot RAS\_N\_HUMAN  
AA change Q/L  
Protein position 61

|      | class  | score | transFIC <sup>2</sup> |
|------|--------|-------|-----------------------|
| SIFT | High   | 1     | 6.143                 |
| PPH2 | High   | 0.919 | 2.723                 |
| MA   | Medium | 3.875 | 2.154                 |

Close

NPAS x New selection...

Mutations Genes by cancer site Pathways

Table Matrix Choose one cancer site...

| +gene | +cancer site            | fm-bias  | clust-bias | +samples-mut | +mut-freq | +CGC    | driver-category | +COSMIC |
|-------|-------------------------|----------|------------|--------------|-----------|---------|-----------------|---------|
| NRAS  | hematopoietic and re... | 1.454E-7 | 1.33E-6    | 16 / 395     | 0.041     | CGC Dom | HCD             |         |
| NRAS  | colon                   | 3.244E-7 | 2.782E-7   | 17 / 229     | 0.074     | CGC Dom | HCD             |         |
| NRAS  | corpus uteri            | 8.86E-4  |            | 9 / 230      | 0.039     | CGC Dom | HCD             |         |
| NRAS  | lung and bronchus       | 0.132    | 3.65E-7    | 11 / 665     | 0.017     | CGC Dom | HCD             |         |
| NRAS  | breast                  | 0.994    |            | 6 / 1148     | 0.005     | CGC Dom | HCD             |         |
| NRAS  | oropharynx              |          |            | 2 / 375      | 0.005     | CGC Dom | HCD             |         |
| NRAS  | stomach                 |          |            | 1 / 22       | 0.045     | CGC Dom | HCD             |         |
| NRAS  | pancreas                |          |            | 1 / 214      | 0.005     | CGC Dom | HCD             |         |
| NRAS  | ovary                   |          |            | 3 / 316      | 0.009     | CGC Dom | HCD             |         |
| NRAS  | kidney                  |          |            | 1 / 417      | 0.002     | CGC Dom | HCD             |         |
| NRAS  | bladder                 |          |            | 4 / 98       | 0.041     | CGC Dom | HCD             |         |
| NRAS  | brain                   |          |            | 2 / 492      | 0.004     | CGC Dom | HCD             |         |

intOGen Mutations
